# Supplementary material for: Research Resources: Comparative MicroRNA Profiles in Human Corona Radiata Cells and Cumulus Oophorus Cells Detected by Next-Generation Small RNA Sequencing
Source: PLoS One. 2014 Sep 4;9(9):e106706. doi: 10.1371/journal.pone.0106706 (PMC4154750; doi:10.1371/journal.pone.0106706)
Supplement: Table S2 — The top 10 miRNA editings in the miRNA expression profile of COCs and CRCs. (XLSX) [file pone.0106706.s004.xlsx]

## Sheet: Sheet1
Supplementary Table 2a. The top 10 miRNA editings in the miRNA expression profile of COCs.
Precursor name	Matire name	Editing Type
		A->T		A->G		A->C		T->A		T->G		T->C		G->A		G->T		G->C		C->A		C->T		C->G
		unique	total	unique	total	total	unique	unique	total	unique	total	unique	total	unique	total	unique	total	unique	total	unique	total	unique	total	unique	total
hsa-let-7b	hsa-let-7b-5p	13	24	12	33	2	2	7	9	13	15	8	9	16	17	19	38	8	17	0	0	0	0	0	0
hsa-let-7a-3	hsa-let-7a-5p	10	65	9	64	3	9	8	23	43	779	4	6	11	55	12	186	10	30	0	0	0	0	0	0
hsa-let-7c	hsa-let-7c-5p	10	18	31	217	2	2	10	13	12	16	4	4	8	8	17	26	10	17	0	0	0	0	0	0
hsa-mir-1273f	hsa-miR-1273f	9	10	137	294	1	3	9	13	1	2	39	82	33	49	7	9	1	2	0	0	0	0	0	0
hsa-let-7d	hsa-let-7d-5p	9	60	2	2	1	1	0	0	3	54	0	0	2	2	3	3	0	0	0	0	0	0	0	0
hsa-let-7f-2	hsa-let-7f-5p	8	14	9	50	5	6	8	20	16	29	10	11	17	23	15	50	5	6	0	0	0	0	0	0
hsa-let-7e	hsa-let-7e-5p	8	313	6	1275	3	127	5	934	6	1756	3	929	9	1485	52	9329	9	402	0	0	0	0	0	0
hsa-let-7f-1	hsa-let-7f-5p	5	40	9	17	1	1	11	15	10	26	13	21	10	17	11	20	9	40	0	0	0	0	0	0
hsa-mir-548z	hsa-miR-548z	4	7	0	0	0	0	0	0	0	0	0	0	0	0	0	0	0	0	0	0	0	0	0	0
hsa-mir-181a-2	hsa-miR-181a-5p	4	7	3	4	1	26	1	1	1	1	0	0	2	6	0	0	1	2	3	3	6	20	1	2
Supplementary Table 2b. The top 10 miRNA editings in the miRNA expression profile of CRCs.
Precursor name	Matire name	Editing Type
		A->T		A->G		A->C		T->A		T->G		T->C		G->A		G->T		G->C		C->A		C->T		C->G
		unique	total	unique	total	total	unique	unique	total	unique	total	unique	total	unique	total	unique	total	unique	total	unique	total	unique	total	unique	total
hsa-let-7b	hsa-let-7b-5p	17	44	22	55	1	3	10	16	24	25	17	19	18	25	41	73	20	46	0	0	0	0	0	0
hsa-let-7a-3	hsa-let-7a-5p	13	54	7	34	2	9	4	106	37	767	8	43	10	181	23	129	8	36	0	0	0	0	0	0
hsa-let-7a-1	hsa-let-7a-5p	9	12	12	156	3	5	12	22	47	713	10	90	8	36	24	281	12	64	0	0	0	0	0	0
hsa-let-7f-2	hsa-let-7f-5p	9	14	7	90	2	2	5	6	13	25	15	18	13	22	21	105	8	9	0	0	0	0	0	0
hsa-let-7e	hsa-let-7e-5p	8	268	9	1078	4	81	10	857	12	1653	4	795	12	1525	66	10016	8	530	0	0	0	0	0	0
hsa-let-7f-1	hsa-let-7f-5p	8	69	16	23	3	6	15	24	19	38	6	12	15	32	20	31	12	59	0	0	0	0	0	0
hsa-let-7c	hsa-let-7c-5p	7	19	20	145	1	2	6	11	15	18	7	8	3	5	17	34	12	22	0	0	0	0	0	0
hsa-let-7d	hsa-let-7d-5p	6	48	1	2	0	0	0	0	3	45	0	0	3	3	4	5	1	1	0	0	0	0	0	0
hsa-mir-1273f	hsa-miR-1273f	6	8	132	281	0	0	5	6	3	3	32	75	33	57	4	5	3	3	0	0	0	0	0	0
hsa-mir-202	hsa-miR-202-5p	5	8	0	0	0	0	11	58	3	3	9	43	2	2	1	1	0	0	3	5	47	637	0	0
hsa-let-7i	hsa-let-7i-5p	4	4	1	1	0	0	0	0	2	2	0	0	2	2	0	0	1	1	0	0	0	0	0	0
